# Supplementary material for: Microfluidic synthesis of chemically and physically anisotropic hydrogel microfibers for guided cell growth and networking
Source: Royal Society of Chemistry journal article supplement (doi:10.1039/c2sm07263g), 2012-01-01
Supplement: c2sm07263g.pdf [file c2sm07263g.pdf]

## Electronic supplementary information

for

### Microfluidic Synthesis of Chemically and Physically Anisotropic Hydrogel Microfibers for Guided Cell Growth and Networking

Masumi Yamada,\* Sari Sugaya, Yoji Naganuma, and Minoru Seki

Department of Applied Chemistry and Biotechnology, Chiba University  
1-33 Yayoi-cho, Inage-ku, Chiba 263-8522, Japan

\*E-mail: m-yamada@faculty.chiba-u.jp; Tel/fax; +81-43-290-3398

List of electronic supplemental information:

**Figure S1.** Preparation of anisotropic hydrogel fibers with various diameters, obtained by using microdevices with 6 inlet channels.

**Figure S2.** Preparation of solid-soft anisotropic fibers and fibers composed of three regions.

**Figure S3.** Guided growth of HeLa cells in solid-soft-solid complex alginate fibers.

**Figure S4.** Localization of FITC-labeled collagen in the anisotropic fibers on Day 1.

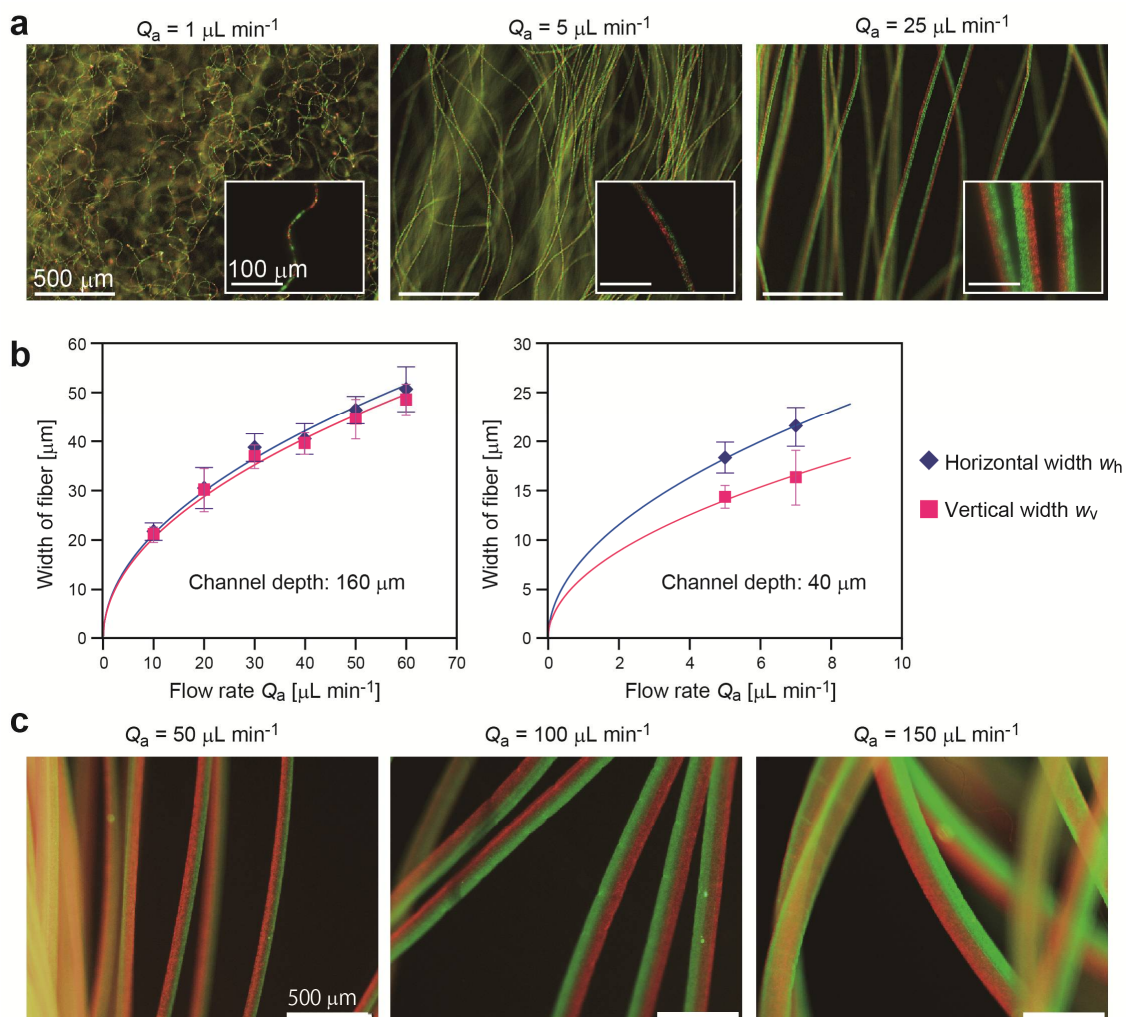

**Figure S1.** Preparation of anisotropic hydrogel fibers with various diameters, obtained by using microdevices with 6 inlet channels. (a) Fibers obtained by using a microchannel with the width and depth of 400 and 160  $\mu\text{m}$ , respectively.  $Q_b$  and  $Q_c$  were 10 and 100  $\mu\text{L min}^{-1}$ , respectively. (b) Relation between the alginate flow rate  $Q_a$  and the vertical/horizontal widths of the fiber, when microchannels with the depth of 160 or 40  $\mu\text{m}$  were employed. The microchannel width was 400  $\mu\text{m}$ . The ratios of the horizontal/vertical widths of the fibers were  $\sim 1.0$  and  $\sim 1.2$  for 160- and 40- $\mu\text{m}$  deep microchannels, respectively. (c) Fibers obtained by using a broader microchannel with both the width and depth of 800  $\mu\text{m}$ .  $Q_b$  and  $Q_c$  were 30 and 200  $\mu\text{L min}^{-1}$ , respectively. The average diameters of the fibers were  $\sim 95$ ,  $\sim 145$ , and  $\sim 200 \mu\text{m}$ , respectively.

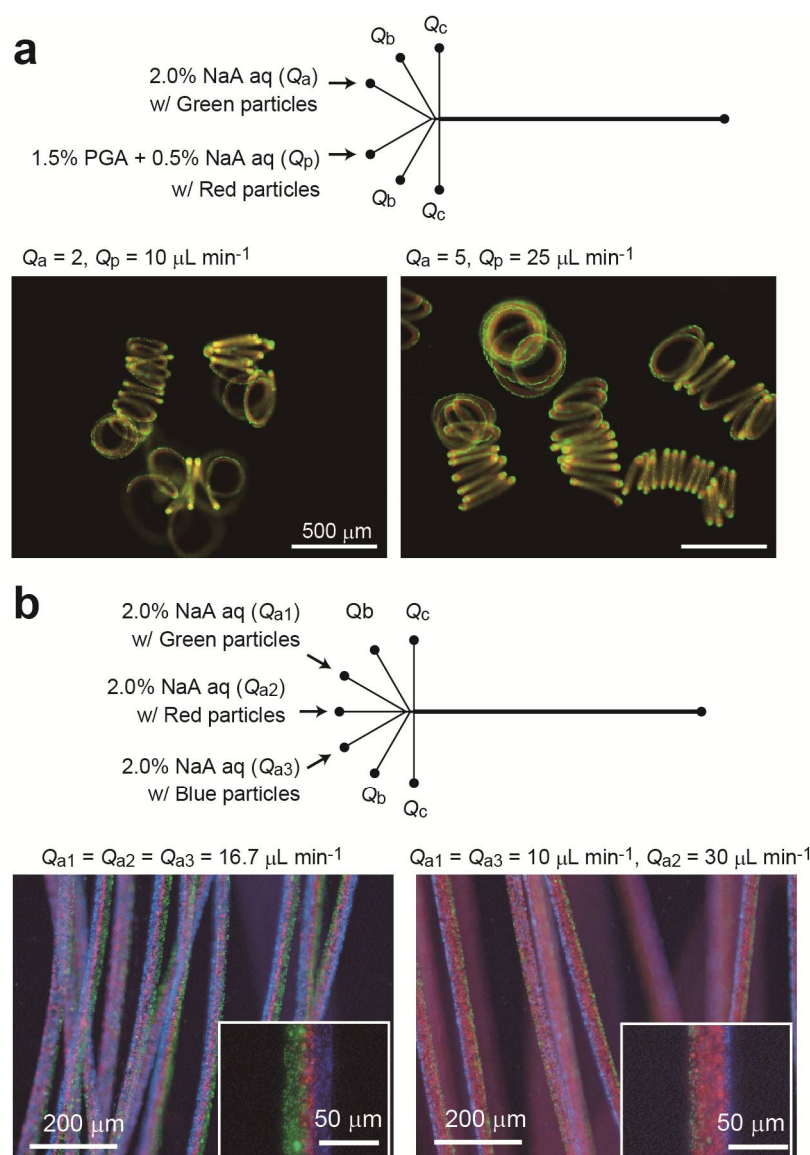

**Figure S2.** (a) Spiral fibers prepared by using sodium alginate (NaA) and propylene glycol alginate (PGA) using the 6-inlet microchannel with the width and depth of 400 and 80  $\mu\text{m}$ , respectively. The obtained fibers were cut into 10 mm-long fragments.  $Q_c$  and  $Q_b$  were 100 and 10  $\mu\text{L min}^{-1}$ , respectively, while  $Q_a$  and  $Q_p$  were changed as indicated. The average diameters  $\pm$  SD of the curvature were  $256 \pm 52 \mu\text{m}$  (left) and  $323 \pm 49 \mu\text{m}$  (right), respectively. (b) Anisotropic fibers composed of three regions containing different-color particles. The width of each region could freely be controlled by changing the introduced flow rates.

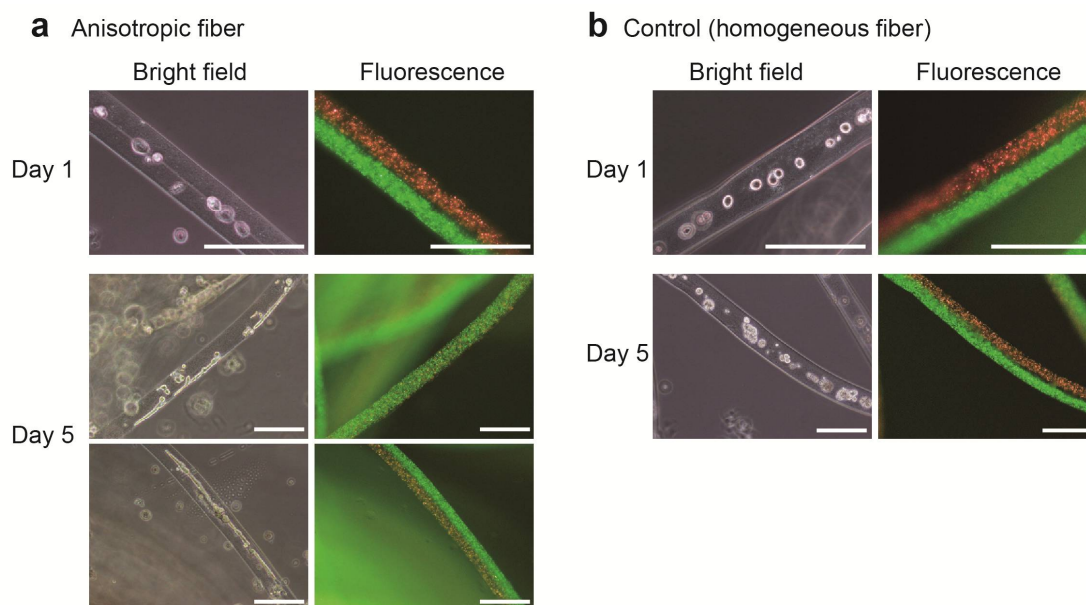

**Figure S3.** Guided growth of HeLa cells in the core of the solid-soft-solid anisotropic Ca-alginate fibers. The experimental conditions are the same as those in the experiments using NIH-3T3 cells described in the manuscript, except for the initial cell concentration ( $2 \times 10^7$  cells  $\text{mL}^{-1}$ , which is two times higher than that shown in Figure 4). (a) HeLa cells cultured in the solid-soft-solid anisotropic fibers for 1 or 5 days, and (b) HeLa cells in the homogeneous fiber, totally made from 2.0% NaA solutions. In (a), linear colonies were formed along the fiber direction on Day 5, while the colony shape was spherical in (b). Scale bar, 200  $\mu\text{m}$ .

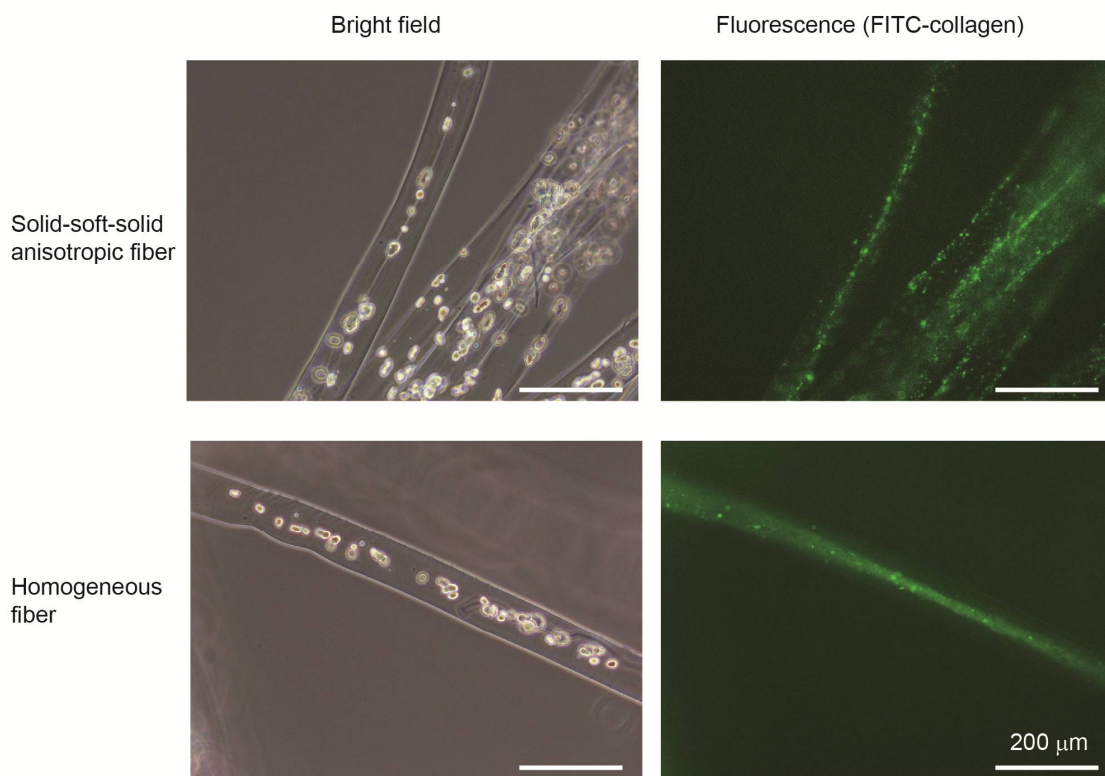

**Figure S4.** Localization of FITC-labeled collagen in the anisotropic fibers incorporating PC12 cells in the core on Day 1. The FITC-collagen molecules were localized in the core with a width of  $\sim 8\ \mu\text{m}$  (solid-soft-solid fibers) or  $\sim 12\ \mu\text{m}$  (homogeneous fibers). Scale bar,  $200\ \mu\text{m}$ .
